# Supplementary material for: QTL Mapping and Diurnal Transcriptome Analysis Identify Candidate Genes Regulating Brassica napus Flowering Time
Source: MDPI journal article supplement (doi:10.3390/ijms22147559), 2021-07-15
Supplement: s1 [file s1]

Supplementary Figures

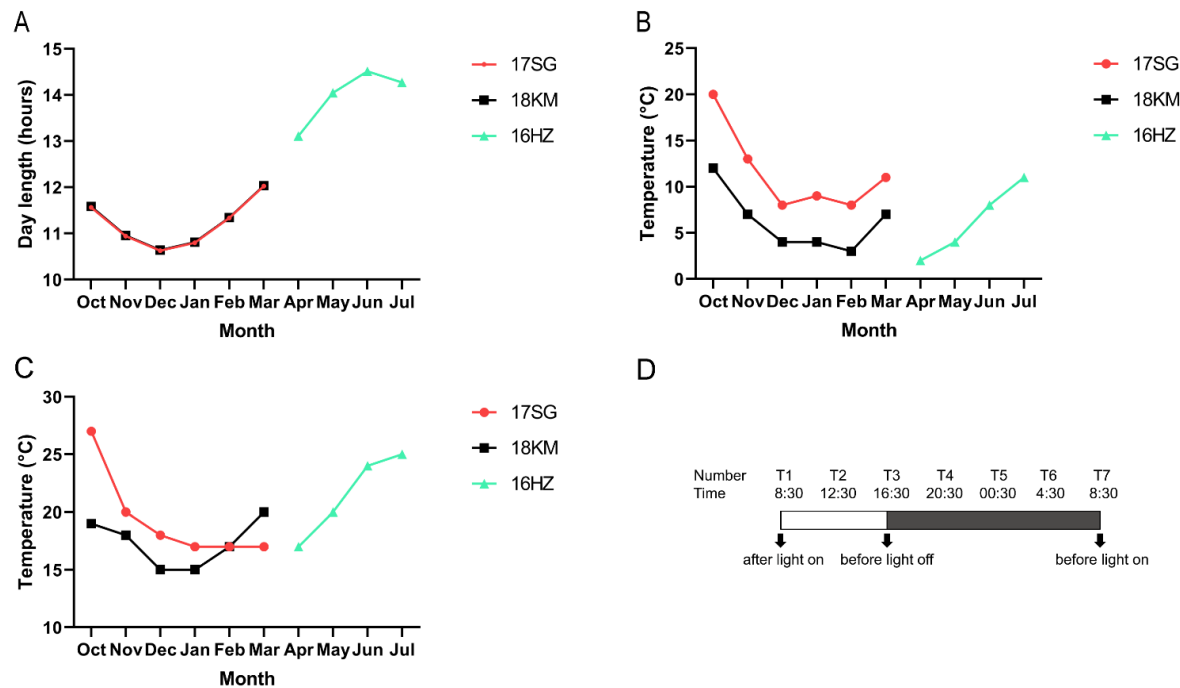

**Figure S1.** Average day length, temperature, and RNA-seq sampling diagram. Monthly average day length (A) and monthly average minimum (B) and maximum (C) temperature in three environments, and RNA-seq sampling diagram (D). Day length data was obtained from <https://richurimo.51240.com/>, and temperature data from <http://www.tianqi.com/>. T1-T7 represents seven sampling time-points during a day.

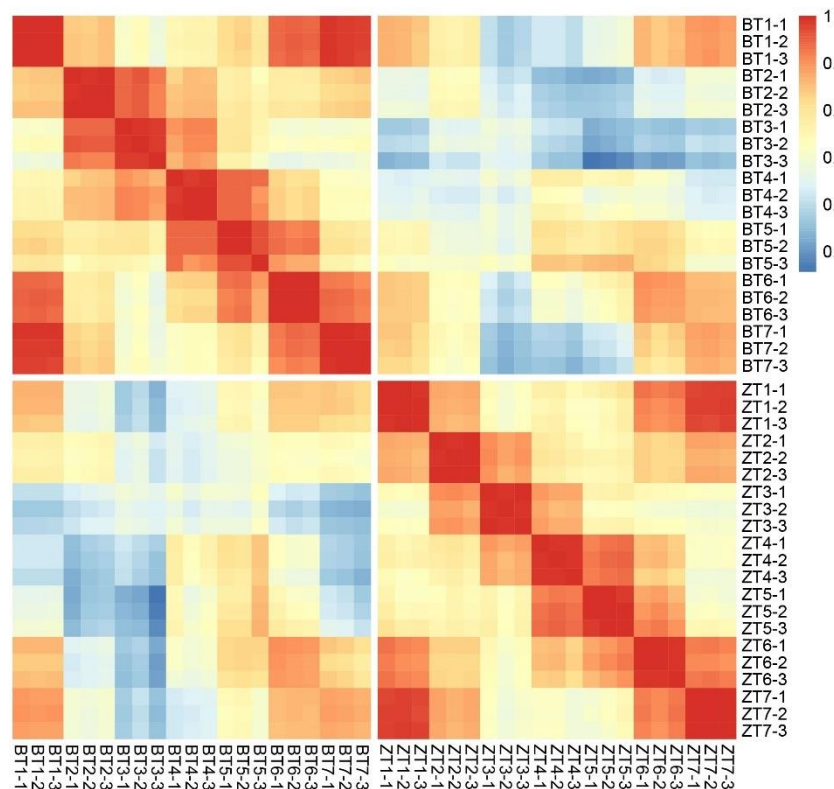

**Figure S2.** Heat map for correlation between RNA sequencing samples. Redder color indicates higher correlation between samples. B represents B409; Z represents ZS8; T1-T7 represent sampling time-points, -1, -2, -3 represent three biological replicates at each time-point.

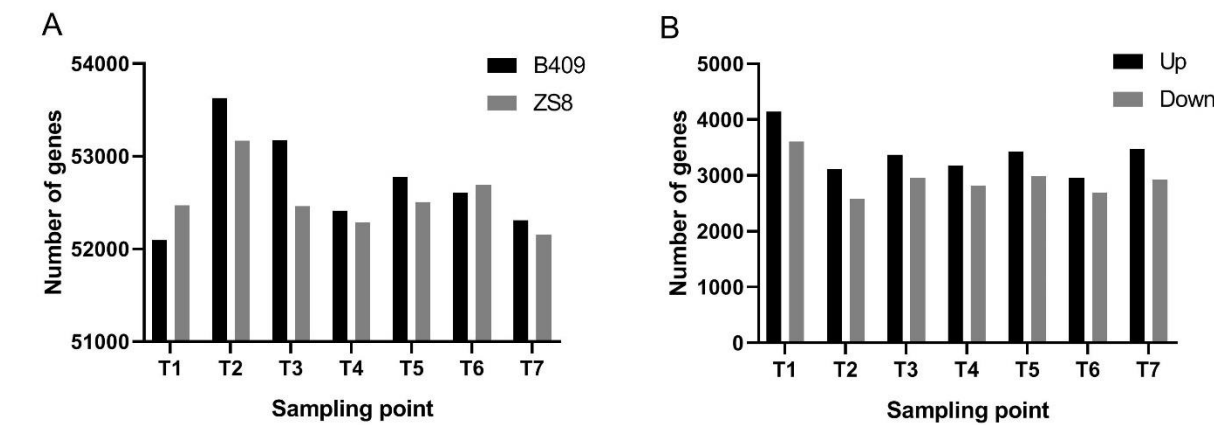

**Figure S3.** Column chart of gene expression. Number of genes expressed (A) and differentially expressed (B) at each time-point in RNA-seq data.

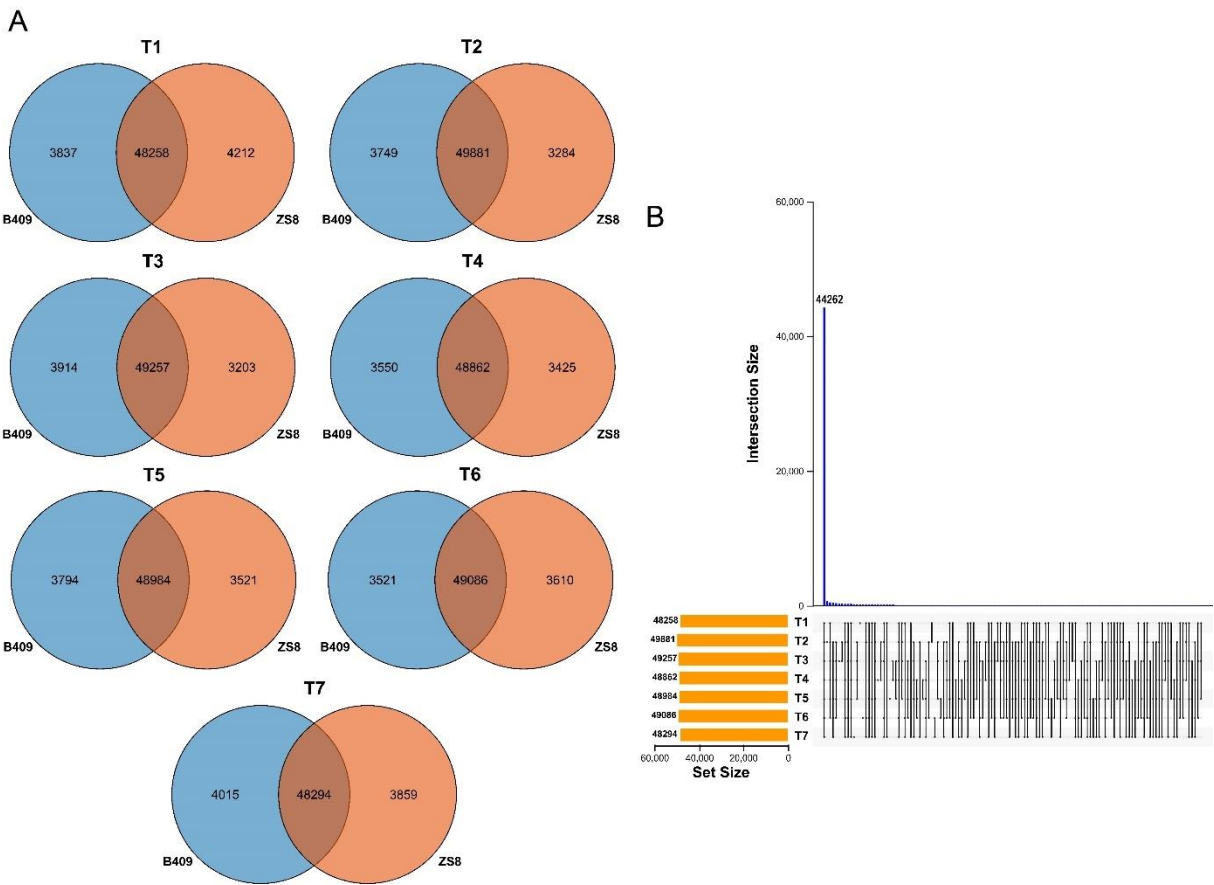

**Figure S4.** Venn diagram of expressed genes in B409 and ZS8. (A)Venn diagram of genes expressed in B409 and ZS8 at each time-point, and (B) UpSet Venn diagram of commonly expressed genes in B409 and ZS8 at each time-point.

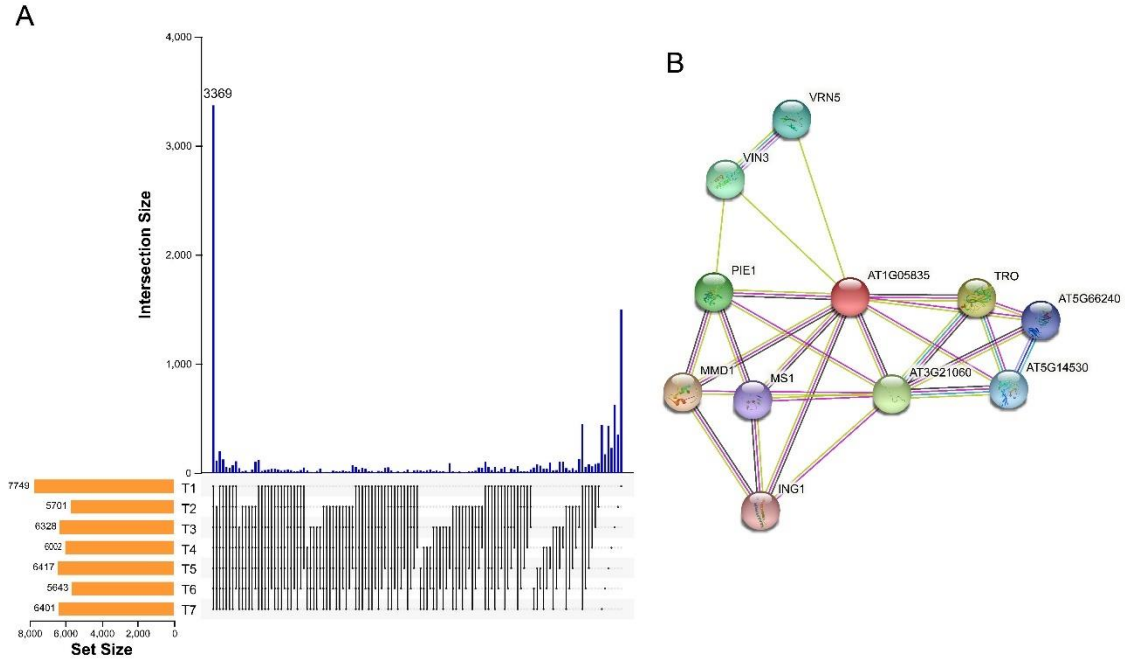

**Figure S5.** UpSet Venn of DEGs and protein interaction network diagrams. (A) UpSet Venn diagram of DEGs for B409 compared to ZS8, and (B) AT1G05835 protein interaction network diagram using STRING website (<https://stringdb.org/cgi/input.pl>, last accessed date 9 February 2021).

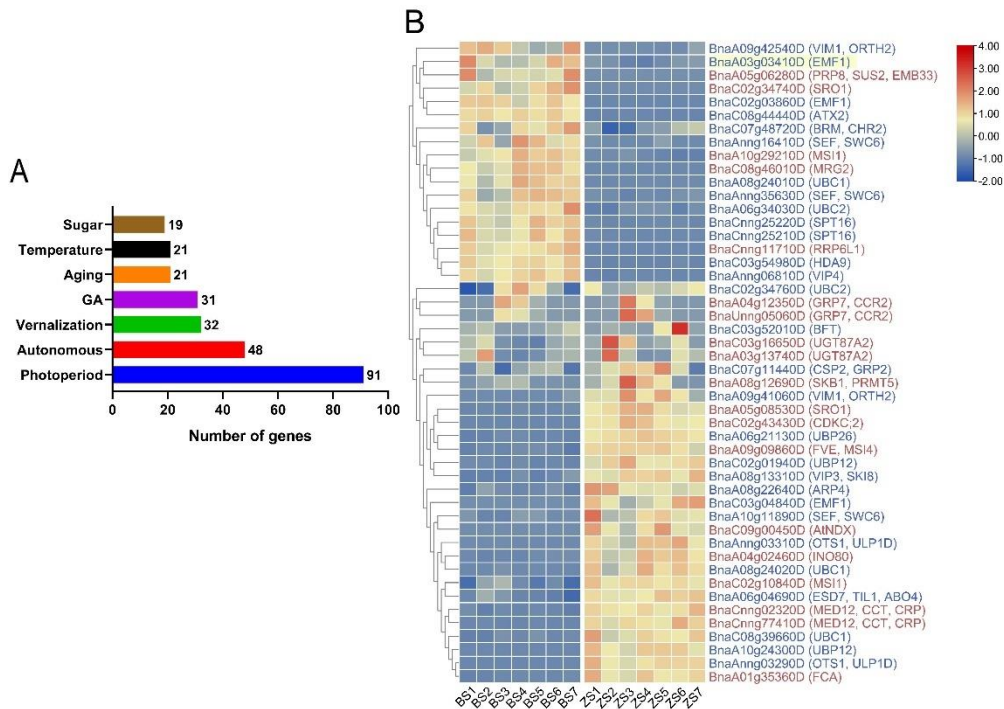

**Figure S6.** Histogram and heat map of differentially expressed flowering-time genes. (A) Histogram of number of differentially expressed flowering-time genes in seven pathways. (B) Heat map of differential expression of autonomous pathway flowering-time genes. Red and blue gene names indicate genes that are positive and negative flowering-time regulators, respectively. Gene name with yellow background are candidate genes in QTL intervals.

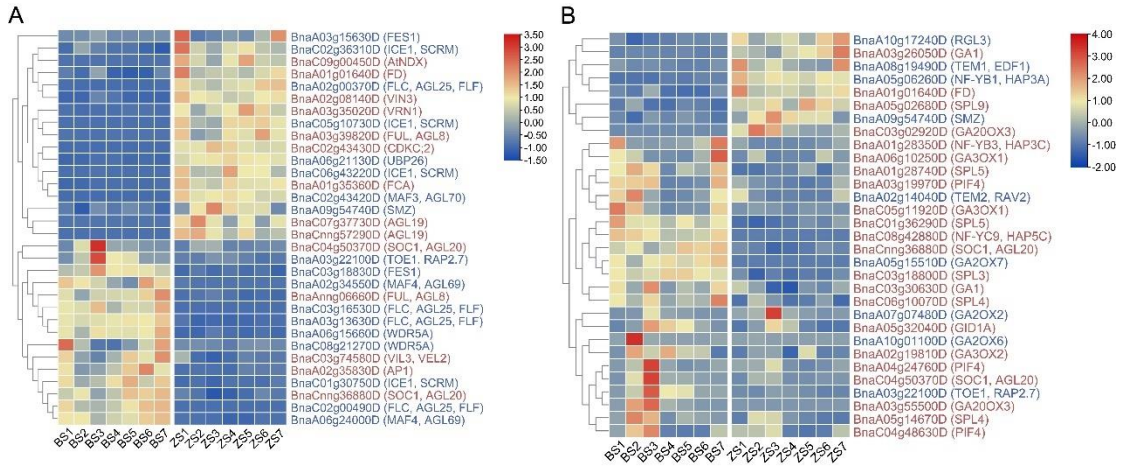

**Figure S7.** Heat map of differential expression of flowering-time genes in vernalization and GA pathways. Heat map of differential expression of flowering-time genes in vernalization (**A**) and GA pathways (**B**). Red and blue gene names indicate positive and negative flowering-time gene regulators, respectively. Gene names with yellow background indicate candidate genes in QTL interval.

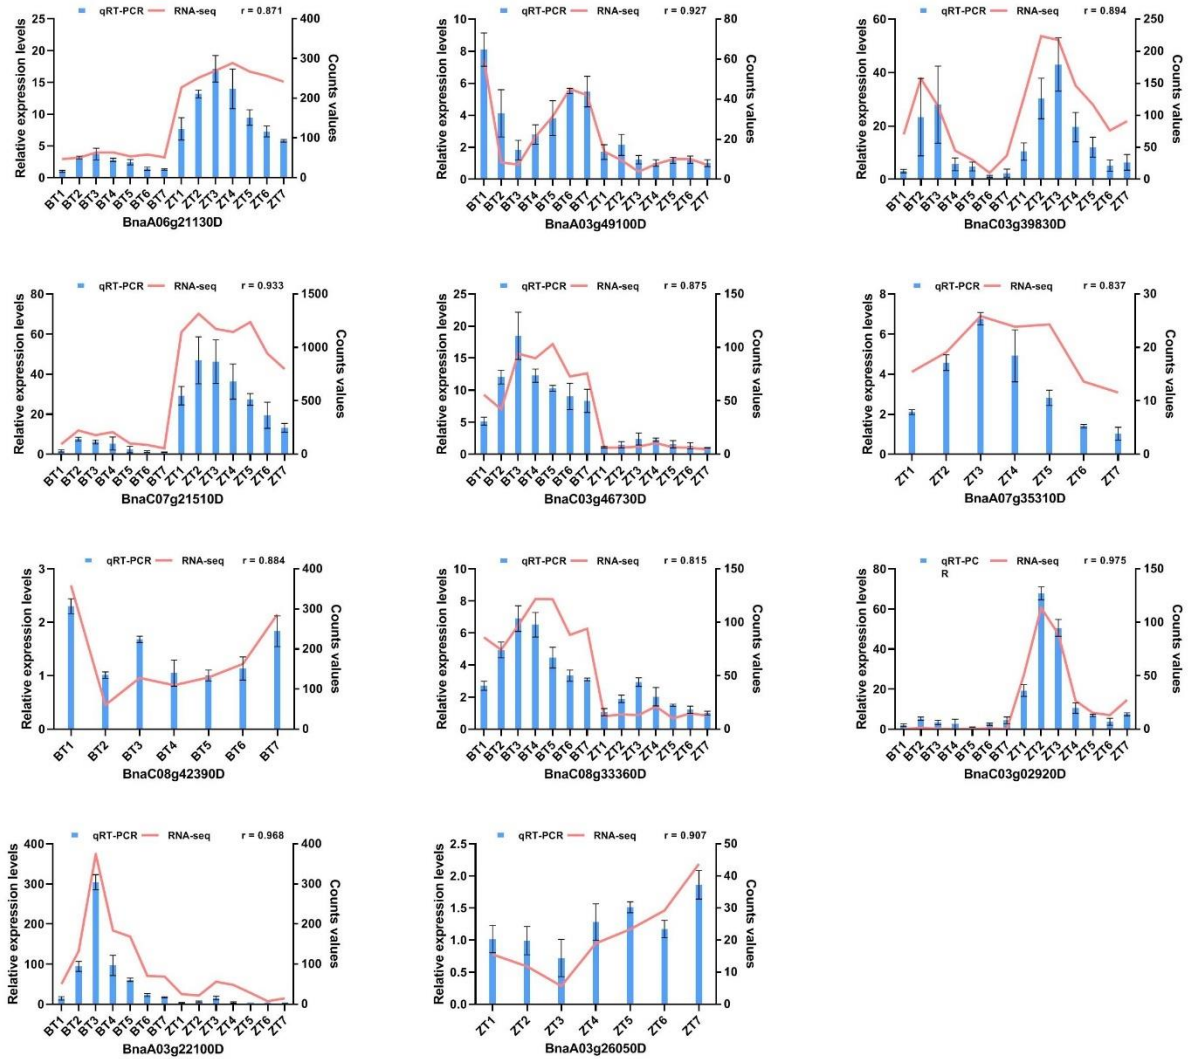

**Figure S8.** qRT-PCR validation of eleven randomly selected DEGs. Column charts illustrate relative gene expression levels (mean  $\pm$  SE) determined via qRT-PCR. Line charts illustrate gene expression counts values obtained via RNA-seq.  $r$  represents the Pearson correlation coefficient of gene expression determined via qRT-PCR and RNA-seq.
