# Supplementary material for: QTL Mapping and Diurnal Transcriptome Analysis Identify Candidate Genes Regulating Brassica napus Flowering Time
Source: Int J Mol Sci. 2021 Jul 15;22(14):7559. doi: 10.3390/ijms22147559 (PMC8305928; doi:10.3390/ijms22147559)
Supplement: Supplementary file 1 [file ijms-22-07559-s001.zip › Supplement Tables.xlsx]

## Sheet: Table S1
Table S1. Flowering time of B409 and two other materials under different day lengths
Day lengtha (h)	The date of flowering time (repeat1)b			The date of flowering time (repeat2)b
	Huayouza62	2063A	B409	Huayouza62	2063A	B409
nature	7.18	7.2	7.14	7.14	7.2	7.13
14.5	7.21 (+3)	7.25 (+5)	7.30 (+16)	7.23 (+9)	7.25 (+5)	7.29 (+16)
13	7.31 (+13)	8.2 (+12)	8.26 (+42)	7.31 (+16)	8.2 (+13)	8.30 (+46)
11.5	8.10 (+22)	8.6 (+16)	9.20 (+67)	8.11 (+27)	8.7 (+18)	9.19 (+66)
a Natural day length and day length under artificial shade in Hezheng, Gansu, China.
b Flowering dates under different day lengths; numbers in parentheses represent number of days delayed compared to flowering time in natural day length (without artificial shade).

## Sheet: Table S2
Table S2. Correlation of flowering time among three environments.
Environment	18KM	16HZ
17SG	0.807****a	0.526****
18KM		0.436****
a Significance level: ****P < 0.0001

## Sheet: Table S3
Table S3. Analysis of variance for flowering time in three environments
Variance source	DFa	SSb	MSc	F valued
Genotype	146	38934.7	266.676	7.209***
Environment	2	357254	178627	4828.993***
Genotype×Environment	210	23877.4	113.702	3.074***
Error	315	11652	36.99
a Degree of freedom
b Sum square
c Mean square
d F-test value
e Significance level: ***p < 0.001

## Sheet: Table S4
Table S4. Distribution of SNPs and SSR markers on 18 genetic linkage groups.
Linkage groups	Map length (cM)	No. of markers	Average distance between markers (cM/marker)
A01	206.313	214	0.964079
A02	111.762	107	1.0445
A03	138.498	69	2.00722
A04	242.859	265	0.916449
A05	187.689	113	1.66096
A06	127.645	151	0.845331
A07	81.396	77	1.05709
A08	134.183	141	0.951652
A09	102.029	110	0.927536
A10	122.88	121	1.01554
C01	152.794	83	1.84089
C02	90.625	99	0.915404
C03	85.979	196	0.438668
C04	287.866	263	1.09455
C05	76.342	24	3.18092
C06	18.863	33	0.571606
C08	29.42	41	0.717561
C09	56.171	70	0.802443
Total	2253.31	2177	1.03505
A subgenome	1455.25	1368	1.06378
C subgenome	798.06	809	0.986477

## Sheet: Table S5
Table S5. Quality evaluation of RNA-seq reads and mapped to reference genome
Sample namea	No. of raw reads	No. of clean reads	Q20(%)b	Q30(%)b	Mapped reads(%)c	Uniquely mapped reads(%)c
BT1-1	38875948	38178838	97.98	93.98	93.44	84.04
BT1-2	41624838	41068794	98.03	94.12	93.43	83.86
BT1-3	53984674	53170446	97.95	93.91	93.5	83.97
BT2-1	43194234	42609644	97.81	93.64	93.44	83.69
BT2-2	46799502	45905066	98.02	94.13	93.47	84.04
BT2-3	45953912	45324878	98.11	94.28	93.7	84.23
BT3-1	55313146	54375658	98.15	94.37	93.36	84.12
BT3-2	48047468	47333566	97.94	93.92	93.5	83.97
BT3-3	50073848	49333392	97.88	93.81	93.26	83.75
BT4-1	40353850	39790064	98.01	94.08	93	83.1
BT4-2	54338100	53690462	98.08	94.22	93.09	83.21
BT4-3	65301704	64394102	97.92	93.91	93.04	83.16
BT5-1	48148646	47536920	97.98	94.02	93.02	83.17
BT5-2	50235348	49534210	97.94	93.93	93.01	83.17
BT5-3	41729680	40956004	97.91	93.86	92.95	83.13
BT6-1	47110460	46564928	98.06	94.16	93.36	83.41
BT6-2	44736916	44236114	98	93.97	93.14	83.36
BT6-3	42946228	42498190	98.03	94.1	93.28	83.38
BT7-1	44702458	44048048	97.87	93.77	93.28	83.7
BT7-2	46427930	45809290	98	94.12	93.42	83.84
BT7-3	41518298	40990968	97.94	93.92	93.3	83.93
ZT1-1	51191126	50523068	97.98	93.97	93.09	83.31
ZT1-2	44829620	44132862	97.58	93.14	92.64	82.84
ZT1-3	42343120	41651292	98.06	94.13	93.07	83.66
ZT2-1	44823668	44267354	98.07	94.2	93.33	83.88
ZT2-2	59256232	58515242	97.9	93.87	93.08	83.36
ZT2-3	45148462	44221448	97.99	94.03	93.26	83.88
ZT3-1	45673832	44565026	97.97	93.97	93.05	83.57
ZT3-2	44457468	43784194	98	94	93.11	83.4
ZT3-3	54373802	53374864	98.01	94.08	93.03	83.48
ZT4-1	53473722	52463778	98.06	94.17	93.07	83.27
ZT4-2	47827548	47275938	97.99	94.01	92.91	82.86
ZT4-3	49419628	48663108	98.02	94.03	92.92	83.17
ZT5-1	48034818	47395748	97.9	93.84	92.98	83.08
ZT5-2	45215078	44467728	97.66	93.29	92.75	82.71
ZT5-3	53761394	52866730	98	94.04	93.04	83.37
ZT6-1	45943308	45197344	97.95	93.91	93.09	83.37
ZT6-2	48228156	47553768	97.94	93.98	92.92	83.06
ZT6-3	40990160	40143454	98.14	94.35	93.38	84.03
ZT7-1	46307518	45036014	98.09	94.24	93.38	84.05
ZT7-2	41935574	40943466	98.17	94.41	93.4	83.95
ZT7-3	55638360	54479688	97.97	94	93.29	83.54
a B represents B409, Z represents ZS8, T1-T7 represent the time points of sampling, -1, -2, -3 represent three biological replicates at each time point.
b Percent of bases with a phred values greater than 20 and 30 to the total bases.
c Percent of mapped reads and uniquely mapped reads (only mapped one position) to reference genome in the clean reads.

## Sheet: Table S6
Table S6. Correlation between biological replicates in RNA-seq
Sample 1	Sample 2	ra	Sample 1	Sample 2	ra
BS1-1	BS1-2	0.999	ZS1-1	ZS1-2	0.995
BS1-1	BS1-3	0.999	ZS1-1	ZS1-3	0.991
BS1-2	BS1-3	0.999	ZS1-2	ZS1-3	0.996
BS2-1	BS2-2	0.993	ZS2-1	ZS2-2	0.995
BS2-1	BS2-3	0.995	ZS2-1	ZS2-3	0.996
BS2-2	BS2-3	0.996	ZS2-2	ZS2-3	0.997
BS3-1	BS3-2	0.992	ZS3-1	ZS3-2	0.989
BS3-1	BS3-3	0.988	ZS3-1	ZS3-3	0.995
BS3-2	BS3-3	0.984	ZS3-2	ZS3-3	0.993
BS4-1	BS4-2	0.986	ZS4-1	ZS4-2	0.994
BS4-1	BS4-3	0.99	ZS4-1	ZS4-3	0.991
BS4-2	BS4-3	0.995	ZS4-2	ZS4-3	0.991
BS5-1	BS5-2	0.998	ZS5-1	ZS5-2	0.995
BS5-1	BS5-3	0.965	ZS5-1	ZS5-3	0.989
BS5-2	BS5-3	0.963	ZS5-2	ZS5-3	0.995
BS6-1	BS6-2	0.997	ZS6-1	ZS6-2	0.995
BS6-1	BS6-3	0.995	ZS6-1	ZS6-3	0.99
BS6-2	BS6-3	0.998	ZS6-2	ZS6-3	0.992
BS7-1	BS7-2	0.998	ZS7-1	ZS7-2	0.997
BS7-1	BS7-3	0.993	ZS7-1	ZS7-3	0.997
BS7-2	BS7-3	0.995	ZS7-2	ZS7-3	0.995
a Pearson correlation coefficient of between biological replicates

## Sheet: Table S7
Table S7. Information of 123 representative GO terms
Class	GO name	GO ID	GO level	Enrichment score	No. of genes	q-value (BH method)
Biological process	response to biotic stimulus	GO:0009607	3	1.21244	1370	0
Biological process	response to karrikin	GO:0080167	4	1.82864	193	8.52e-13
Biological process	flavonoid biosynthetic process	GO:0009813	5	1.86349	276	8.52e-13
Biological process	flavonoid metabolic process	GO:0009812	4	1.83499	308	5.11e-13
Biological process	response to abiotic stimulus	GO:0009628	3	1.17271	2163	6.39e-13
Biological process	response to other organism	GO:0051707	5	1.21	1351	5.68e-13
Biological process	interspecies interaction between organisms	GO:0044419	2	1.20722	1362	7.35e-13
Biological process	response to UV-B	GO:0010224	7	1.93967	137	2.66e-12
Biological process	response to external stimulus	GO:0009605	3	1.16664	1789	4.62e-12
Biological process	response to wounding	GO:0009611	4	1.45462	376	6.6e-12
Biological process	response to sucrose	GO:0009744	7	1.61186	237	9.55e-12
Biological process	organic hydroxy compound metabolic process	GO:1901615	4	1.29412	644	2.27e-10
Biological process	secondary metabolic process	GO:0019748	3	1.30042	560	3.01e-09
Biological process	alcohol metabolic process	GO:0006066	5	1.57401	201	4.65e-09
Biological process	response to carbohydrate	GO:0009743	5	1.37017	386	6.84e-09
Biological process	indole-containing compound metabolic process	GO:0042430	5	1.58178	185	1.58e-08
Biological process	response to nitrogen compound	GO:1901698	4	1.265	629	1.67e-08
Biological process	response to organic cyclic compound	GO:0014070	5	1.25534	651	2.79e-08
Biological process	secondary metabolite biosynthetic process	GO:0044550	4	1.39268	308	8.18e-08
Biological process	cellular response to stress	GO:0033554	4	1.16899	1109	3.11e-07
Biological process	small molecule metabolic process	GO:0044281	3	1.11567	1976	3.16e-07
Biological process	sulfur compound biosynthetic process	GO:0044272	5	1.30448	426	3.16e-07
Biological process	programmed cell death	GO:0012501	4	1.28888	455	4.36e-07
Biological process	cell death	GO:0008219	3	1.27503	490	4.42e-07
Biological process	pigment metabolic process	GO:0042440	3	1.34962	278	5.83e-06
Biological process	response to nitrate	GO:0010167	5	1.41035	214	6.32e-06
Biological process	response to inorganic substance	GO:0010035	4	1.14481	1158	6.8e-06
Biological process	indole-containing compound biosynthetic process	GO:0042435	6	1.51382	149	7.45e-06
Biological process	release of seed from dormancy	GO:0048838	5	4.53308	14	8.52e-06
Biological process	response to oxidative stress	GO:0006979	4	1.25518	449	8.4e-06
Biological process	response to endogenous stimulus	GO:0009719	3	1.13109	1308	1.04e-05
Biological process	innate immune response	GO:0045087	7	1.18485	736	1.3e-05
Biological process	glycosyl compound metabolic process	GO:1901657	5	1.36125	240	1.68e-05
Biological process	immune system process	GO:0002376	2	1.17212	806	1.78e-05
Biological process	auxin metabolic process	GO:0009850	6	1.45771	147	5.46e-05
Biological process	inorganic anion transport	GO:0015698	7	1.31719	260	6.24e-05
Biological process	cellular biogenic amine metabolic process	GO:0006576	7	1.41893	161	8.24e-05
Biological process	cellular hyperosmotic response	GO:0071474	7	4.9648	10	8.85e-05
Biological process	establishment of protein localization to membrane	GO:0090150	7	1.25096	363	9.45e-05
Biological process	benzene-containing compound metabolic process	GO:0042537	5	1.30275	254	0.000149
Biological process	pigment biosynthetic process	GO:0046148	4	1.32964	218	0.000169
Biological process	positive regulation of metabolic process	GO:0009893	5	1.19195	484	0.00043
Biological process	photoprotection	GO:0010117	6	3.19166	15	0.000452
Biological process	cellular glucan metabolic process	GO:0006073	7	1.23201	335	0.000647
Biological process	sulfur compound metabolic process	GO:0006790	4	1.17185	552	0.000688
Biological process	regulation of reactive oxygen species metabolic process	GO:2000377	6	1.31342	194	0.000928
Biological process	cellular response to stimulus	GO:0051716	3	1.07521	1994	0.0011189
Biological process	lipid oxidation	GO:0034440	7	1.33844	156	0.00180487
Biological process	lipid metabolic process	GO:0006629	4	1.11037	1017	0.00192681
Biological process	glycerol transport	GO:0015793	8	5.5854	6	0.00256459
Biological process	amine metabolic process	GO:0009308	5	1.26747	201	0.00427227
Biological process	ion transport	GO:0006811	5	1.10689	945	0.00464235
Biological process	regulation of response to stimulus	GO:0048583	4	1.1321	633	0.00602548
Biological process	cellular response to endogenous stimulus	GO:0071495	4	1.12307	713	0.00607921
Biological process	regulation of biological quality	GO:0065008	3	1.10508	912	0.00688857
Biological process	icosanoid metabolic process	GO:0006690	7	3.7236	8	0.00824324
Biological process	rhythmic process	GO:0048511	2	1.30163	140	0.0101626
Biological process	circadian rhythm	GO:0007623	3	1.30163	140	0.0101626
Biological process	regulation of floral meristem growth	GO:0010080	8	3.50456	8	0.0125409
Biological process	detection of stimulus	GO:0051606	3	1.26711	163	0.0128997
Biological process	reactive oxygen species metabolic process	GO:0072593	4	1.17997	318	0.0132494
Biological process	cellular modified amino acid biosynthetic process	GO:0042398	6	1.46284	66	0.0138185
Biological process	MAPK cascade	GO:0000165	10	1.20823	226	0.0199415
Biological process	response to toxic substance	GO:0009636	4	1.22369	198	0.0206339
Biological process	cell wall macromolecule catabolic process	GO:0016998	7	1.68327	33	0.0226744
Biological process	mRNA cleavage involved in gene silencing by miRNA	GO:0035279	11	3.13566	8	0.0262257
Biological process	oligopeptide transport	GO:0006857	8	1.31656	99	0.0319039
Biological process	response to drug	GO:0042493	4	1.39892	68	0.032091
Biological process	drug transmembrane transport	GO:0006855	6	1.40158	67	0.0324004
Biological process	allantoin catabolic process	GO:0000256	7	3.7236	6	0.032524
Biological process	regulation of cytokinin-activated signaling pathway	GO:0080036	7	2.568	10	0.0381206
Biological process	mitochondrial respiratory chain complex assembly	GO:0033108	8	4.13733	5	0.0389018
Biological process	protein stabilization	GO:0050821	5	2.40939	11	0.0415373
Biological process	detoxification	GO:0098754	2	1.20966	179	0.0431356
Biological process	cell communication	GO:0007154	3	1.05829	1593	0.0444888
Molecular function	glucosyltransferase activity	GO:0046527	6	1.80921	169	1.46e-11
Molecular function	oxidoreductase activity, acting on single donors with incorporation of molecular oxygen	GO:0016701	4	2.26534	50	5.38e-06
Molecular function	oxidoreductase activity	GO:0016491	3	1.16075	958	5.04e-05
Molecular function	tetrapyrrole binding	GO:0046906	4	1.38177	234	4.6e-05
Molecular function	transferase activity, transferring glycosyl groups	GO:0016757	4	1.28249	369	6.11e-05
Molecular function	iron ion binding	GO:0005506	7	1.36326	228	0.000131
Molecular function	nitrate transmembrane transporter activity	GO:0015112	7	2.53718	30	0.000133
Molecular function	ADP binding	GO:0043531	9	1.59998	103	0.000141
Molecular function	hydrolase activity, acting on glycosyl bonds	GO:0016798	4	1.32552	260	0.000176
Molecular function	hydrolase activity, hydrolyzing O-glycosyl compounds	GO:0004553	5	1.32563	244	0.000319
Molecular function	(+)-abscisic acid 8'-hydroxylase activity	GO:0010295	6	4.65149	11	0.000335
Molecular function	heme binding	GO:0020037	5	1.35638	206	0.000367
Molecular function	adenylyl-sulfate reductase activity	GO:0009973	5	6.08923	8	0.000356
Molecular function	oxidoreductase activity, acting on single donors with incorporation of molecular oxygen, incorporation of two atoms of oxygen	GO:0016702	5	2.2119	34	0.000498
Molecular function	pyruvate, phosphate dikinase activity	GO:0050242	6	7.61153	6	0.000529
Molecular function	intramolecular lyase activity	GO:0016872	4	2.95141	19	0.000561
Molecular function	monooxygenase activity	GO:0004497	4	1.36433	171	0.00117518
Molecular function	arsenate reductase (glutaredoxin) activity	GO:0008794	6	2.49931	22	0.00213722
Molecular function	oxidoreductase activity, acting on phosphorus or arsenic in donors	GO:0030613	4	2.49931	22	0.00213722
Molecular function	glutathione transferase activity	GO:0004364	5	1.90288	41	0.00213574
Molecular function	arsenate reductase activity	GO:0030611	4	2.42687	22	0.00289569
Molecular function	trans-cinnamate 4-monooxygenase activity	GO:0016710	6	5.32807	7	0.00350417
Molecular function	ligase activity, forming carbon-sulfur bonds	GO:0016877	4	1.71085	49	0.00580947
Molecular function	glycerol transmembrane transporter activity	GO:0015168	7	5.70865	6	0.00613944
Molecular function	O-methyltransferase activity	GO:0008171	6	1.81006	39	0.0070399
Molecular function	carbon-nitrogen lyase activity	GO:0016840	4	2.01059	28	0.00874403
Molecular function	oxidoreductase activity, acting on the aldehyde or oxo group of donors, NAD or NADP as acceptor	GO:0016620	5	1.67593	48	0.00915865
Molecular function	farnesoic acid O-methyltransferase activity	GO:0019010	7	6.34294	5	0.00915688
Molecular function	metallochaperone activity	GO:0016530	3	3.45979	10	0.00911929
Molecular function	oxygen binding	GO:0019825	4	1.34563	131	0.0097866
Molecular function	naringenin-chalcone synthase activity	GO:0016210	6	4.44006	7	0.0113035
Molecular function	sinapoylglucose-malate O-sinapoyltransferase activity	GO:0016754	8	5.07435	6	0.0113009
Molecular function	oxidoreductase activity, acting on the aldehyde or oxo group of donors	GO:0016903	4	1.50772	62	0.0201673
Molecular function	molybdopterin cofactor binding	GO:0043546	4	5.43681	5	0.0213025
Molecular function	proline dehydrogenase activity	GO:0004657	5	5.43681	5	0.0213025
Molecular function	copper chaperone activity	GO:0016531	8	3.80577	7	0.0295673
Molecular function	ferric iron binding	GO:0008199	8	3.80577	7	0.0295673
Molecular function	oxidoreductase activity, acting on other nitrogenous compounds as donors, with NAD or NADP as acceptor	GO:0046857	5	4.15174	6	0.036971
Molecular function	transporter activity	GO:0005215	2	1.10985	684	0.0349936
Cellular component	external encapsulating structure	GO:0030312	3	1.3184	575	6.88e-10
Cellular component	cell wall	GO:0005618	4	1.31651	569	5.8e-10
Cellular component	plastid	GO:0009536	6	1.08452	2194	0.000311
Cellular component	apoplast	GO:0048046	4	1.26011	342	0.000339
Cellular component	vacuole	GO:0005773	6	1.15752	753	0.00046
Cellular component	plastoglobule	GO:0010287	3	1.74084	60	0.000705
Cellular component	ribulose bisphosphate carboxylase complex	GO:0048492	4	6.35891	5	0.0118274
Cellular component	extracellular region	GO:0005576	3	1.08898	1255	0.015633
Cellular component	box H/ACA snoRNP complex	GO:0031429	6	4.76918	5	0.0461674

## Sheet: Table S8
Table S8. Information of 36 significant enriched KEGG pathways
Pathway name	Main class	No. of genes	Rich factor	q-value (BH method)
Metabolism	Metabolism	1121	1.2154	0
Biosynthesis of other secondary metabolites	Metabolism	167	1.51715	1.47786e-06
Flavonoid biosynthesis	Metabolism	31	2.83365	1.6054e-06
Lipid metabolism	Metabolism	197	1.39847	2.24309e-05
Alanine, aspartate and glutamate metabolism	Metabolism	46	2.03944	5.22209e-05
Sulfur metabolism	Metabolism	35	2.10685	0.000360676
Cytochrome P450	Brite Hierarchies	60	1.70863	0.000545925
Phenylpropanoid biosynthesis	Metabolism	99	1.47189	0.00113482
alpha-Linolenic acid metabolism	Metabolism	31	1.97867	0.00276146
Stilbenoid, diarylheptanoid and gingerol biosynthesis	Metabolism	15	2.64431	0.00507162
Transporters	Brite Hierarchies	252	1.2259	0.00507638
Amino acid metabolism	Metabolism	213	1.24768	0.00528835
Circadian rhythm - plant	Organismal Systems	28	1.88467	0.0094494
Plant hormone signal transduction	Environmental Information Processing	180	1.25729	0.00899443
Metabolism of other amino acids	Metabolism	115	1.33668	0.00906142
Galactose metabolism	Metabolism	34	1.73612	0.010694
Linoleic acid metabolism	Metabolism	11	2.80844	0.0112309
Signal transduction	Environmental Information Processing	237	1.20768	0.0109763
Carotenoid biosynthesis	Metabolism	22	1.96252	0.0136239
Energy metabolism	Metabolism	192	1.22129	0.017514
Unclassified: metabolism	Not Included in Pathway or Brite	138	1.26927	0.0172687
Enzymes with EC numbers	Not Included in Pathway or Brite	134	1.27198	0.0175849
Synthesis and degradation of ketone bodies	Metabolism	7	3.45523	0.0181146
Fatty acid degradation	Metabolism	28	1.74213	0.0186603
Carbohydrate metabolism	Metabolism	330	1.15089	0.0221268
Lipoic acid metabolism	Metabolism	6	3.70203	0.0222283
Butanoate metabolism	Metabolism	15	2.13579	0.0228598
Environmental Information Processing	Environmental Information Processing	241	1.17859	0.0232841
Carbon fixation in photosynthetic organisms	Metabolism	43	1.51607	0.0238917
Polyketide biosynthesis proteins	Brite Hierarchies	5	4.11337	0.025192
Peroxisome	Cellular Processes	51	1.45234	0.0253611
Metabolism of terpenoids and polyketides	Metabolism	88	1.30573	0.0333608
Glycosphingolipid biosynthesis - globo and isoglobo series	Metabolism	10	2.38841	0.03854
Starch and sucrose metabolism	Metabolism	69	1.34089	0.0406241
Photosynthesis - antenna proteins	Metabolism	16	1.91073	0.0431388
Cutin, suberine and wax biosynthesis	Metabolism	22	1.71462	0.0430003

## Sheet: Table S9
Table S9. Number of genes, differentially expressed genes (DEGs), and flowering-time-related DEGs in QTL interval
QTL name	Number of genes	Number of DEGs	Number of DEGs with homologous genes in A. thaliana	Flowering time related genes in DEGs
qFT.A02-1	26	5	5	0
qFT.A03-1	984	203	197	2
qFT.A03-2	93	12	12	0
qFT.A03-3	475	61	60	1
qFT.C08-1	74	8	8	1
Total	1652	289	282	4

## Sheet: Table S10
Table S10. Gene information involved in AT1G05835 (a BnaC08g01530D homologous gene in A. thaliana) protein interaction network
Gene name	Gene ID	Gene information from STRING
MMD1	AT1G66170	RING/FYVE/PHD zinc finger superfamily protein; Encodes a PHD-domain containing protein required for male meiosis. Gene is expressed in developing male meiocytes and protein is localized to the nucleus.
TRO	AT1G51450	Protein TRAUCO; Trithorax-group gene homolog required for early embryogenesis. Required for the expression of FLC and FLC homologs and represses flowering. Required for proper leaf growth and development. Part of COMPASS-like complexes responsible for H3K4 trimethylation, but not for di- or mono-methylation of histone H3 'Lys-4'. Binds to target loci chromatin, increasing H3K4 trimethylation and …
	AT3G21060	Transducin/WD40 repeat-like superfamily protein; Promotes the expression of FLC and FLC homologs to repress the floral transition
PIE1	AT3G12810	Encodes a protein similar to ATP-dependent, chromatin-remodeling proteins of the ISWI and SWI2/SNF2 family. Genetic analyses suggest that this gene is involved in multiple flowering pathways. Mutations in PIE1 results in suppression of FLC-mediated delay of flowering and causes early flowering in noninductive photoperiods independently of FLC. PIE1 is required for expression of FLC in the shoot a…
VIN3	AT5G57380	Fibronectin type III domain-containing protein; Plays a central role in vernalization by mediating the initial transcriptional repression of the homeotic gene FLC, a floral repressor, after a cold treatment. However, due to its transient expression, it cannot maintain repression of FLC, which is then maintained by Polycomb Group complexes containing VRN2 throughout development. Required to deacet…
VRN5	AT3G24440	Fibronectin type III domain-containing protein; Involved in both the vernalization and photoperiod pathways by regulating expression of the related floral repressors FLOWERING LOCUS C (FLC) and FLOWERING LOCUS M (FLM). Together with VIN3, required during vernalization for the modifications of FLC and FLM chromatin that are associated with an epigenetically silenced state (e.g. chromatin modificat…
	AT5G14530	Transducin/WD40 repeat-like superfamily protein; Component of a chromatin regulatory complex involved in regulating chromatin structure in the nucleus (By similarity). Promotes flowering under long days (LD) via the regulation of bolting
	AT5G66240	Transducin/WD40 repeat-like superfamily protein; Contains the following InterPro domains: WD40 repeat 2 (InterPro:IPR019782), WD40 repeat-like-containing domain (InterPro:IPR011046), WD40-repeat-containing domain (InterPro:IPR017986), WD40/YVTN repeat-like-containing domain (InterPro:IPR015943), WD40 repeat (InterPro:IPR001680), WD40 repeat, subgroup (InterPro:IPR019781), G-protein beta WD-40 rep…
MS1	AT5G22260	RING/FYVE/PHD zinc finger superfamily protein; Transcriptional activator required for anther and post- meiotic pollen development and maturation. Seems to regulate inflorescence branching and floral development. May control tapetal development by directly regulating tapetal programmed cell death (PCD) and breakdown. Implicated in pollen cytosolic components and wall development (e.g. exine and in…
ING1	AT3G24010	RING/FYVE/PHD zinc finger superfamily protein; Histone-binding component that specifically recognizes H3 tails trimethylated on 'Lys-4' (H3K4me3), which mark transcription start sites of virtually all active genes

[truncated: 3 more sheets: Table S11, Table S12, Table S13]
